# Supplementary material for: A cost–benefit algorithm for rapid diagnosis of tuberculosis and rifampicin resistance detection during mass screening campaigns
Source: Springer Nature journal article supplement (doi:10.1186/s12879-022-07157-0), 2022-03-04
Supplement: MOESM1 [file 20193390]

## Supplementary file

### Assumptions:

- 1- Epidemiological situation is the same between year 1, year 2 and year 3
- 2- 15 % increase of sample collected per year
- 3- Cost per cartridge concerning Xpert is stable between year 1 and year 3; while Cost per Test concerning TB-LAMP decrease between year 1 and year 2 and is stable between year 2 and year 3
- 4- Both algorithm are implemented in same settings

**Table 6: Cost estimate for prisons using Algorithm 1 (Testing with Gene Xpert MTB/RIF) for three years**

| <b>Algorithm 1: Testing with Gene Xpert MTB/RIF</b>                                    |                                                                                                              |                 |                 |                 |
|----------------------------------------------------------------------------------------|--------------------------------------------------------------------------------------------------------------|-----------------|-----------------|-----------------|
| <b>Items</b>                                                                           |                                                                                                              | <b>Year 1</b>   | <b>Year 2</b>   | <b>Year 3</b>   |
| <b>GeneXpert GX-IV (4-Module System) with Desktop and 2-years warranty extension *</b> |                                                                                                              | <b>17000</b>    | <b>NA</b>       | <b>NA</b>       |
| <b>Shipment</b>                                                                        |                                                                                                              | <b>1000</b>     | <b>NA</b>       | <b>NA</b>       |
| <b>UPS</b>                                                                             |                                                                                                              | <b>1000</b>     | <b>NA</b>       | <b>NA</b>       |
| <b>Printer</b>                                                                         |                                                                                                              | <b>200</b>      | <b>NA</b>       | <b>NA</b>       |
| <b>Air-conditioners</b>                                                                |                                                                                                              | <b>200</b>      | <b>NA</b>       | <b>NA</b>       |
| <b>1-year warranty extension – GX-IV (4-Module System) *</b>                           |                                                                                                              | <b>NA</b>       | <b>NA</b>       | <b>2898</b>     |
| <b>Consumables</b>                                                                     |                                                                                                              | <b>40311.21</b> | <b>46357.89</b> | <b>53311.58</b> |
|                                                                                        | Cost per cartridge *                                                                                         | 9.98            | 9.98            | 9.98            |
|                                                                                        | Number of tests performed during mass screening campaign (15% increase in collected samples number per year) | 3672            | 4222.8          | 4856.22         |
|                                                                                        | Losses due to error/incorrect use (high estimate 10%)                                                        | 367.2           | 422.28          | 485.62          |
|                                                                                        | Total tests performed                                                                                        | 4039.2          | 4645.08         | 5341.84         |

|                            |                                            |                 |                 |                 |
|----------------------------|--------------------------------------------|-----------------|-----------------|-----------------|
| <b>HR costs (per diem)</b> |                                            | <b>27880</b>    | <b>27880</b>    | <b>27880</b>    |
|                            | Technician (160 USD/prison×34 prisons)     | 5440            | 5440            | 5440            |
|                            | Medical Doctor (160 USD/prison×34 prisons) | 5440            | 5440            | 5440            |
|                            | Nurses (160 USD/prison)                    | 5440            | 5440            | 5440            |
|                            | Prison staff (20 USD/prison×34 prisons)    | 680             | 680             | 680             |
|                            | TB Regional Coordinator(160 USD/prison)    | 5440            | 5440            | 5440            |
|                            | Driver (160 USD/prison×34 prisons)         | 5440            | 5440            | 5440            |
| <b>Total Cost</b>          |                                            | <b>87591.21</b> | <b>74237.89</b> | <b>84089.58</b> |

\*References of prices: Global Drug Facility (GDF). Diagnostics Catalog 2018. available on [http://www.stoptb.org/assets/documents/gdf/Diagnostics\\_Catalog\\_2018\\_WEB.pdf](http://www.stoptb.org/assets/documents/gdf/Diagnostics_Catalog_2018_WEB.pdf). NA: not applicable

**Table 7: Cost estimate for prisons using Algorithm 2 (Initial testing with TB-LAMP followed by testing with Xpert MTB/RIF) for three years**

| <b>Algorithm 2: Initial testing with TB-LAMP followed by testing with Xpert MTB/RIF</b> |                                                     |                                                                                          |                  |                                                                                          |                   |                                                       |
|-----------------------------------------------------------------------------------------|-----------------------------------------------------|------------------------------------------------------------------------------------------|------------------|------------------------------------------------------------------------------------------|-------------------|-------------------------------------------------------|
|                                                                                         | <b>Year 1</b>                                       |                                                                                          | <b>Year 2</b>    |                                                                                          | <b>Year 3</b>     |                                                       |
|                                                                                         | <b>HumaLoopT with 1 year warranty upon purchase</b> | <b>GeneXpert GX-IV (4-Module System) with Desktop and 2-years warranty upon purchase</b> | <b>HumaLoopT</b> | <b>GeneXpert GX-IV (4-Module System) with Desktop and 2-years warranty upon purchase</b> | <b>HumaLoop T</b> | <b>GeneXpert GX-IV (4-Module System) with Desktop</b> |
| <b>Items</b>                                                                            |                                                     |                                                                                          |                  |                                                                                          |                   |                                                       |
| <b>Equipement *</b>                                                                     | <b>2870</b>                                         | <b>17000</b>                                                                             | <b>NA</b>        | <b>NA</b>                                                                                | <b>NA</b>         | <b>NA</b>                                             |
| <b>Shipment</b>                                                                         | <b>800</b>                                          | <b>1000</b>                                                                              | <b>NA</b>        | <b>NA</b>                                                                                | <b>NA</b>         | <b>NA</b>                                             |
| <b>UPS</b>                                                                              | <b>470</b>                                          | <b>1000</b>                                                                              | <b>NA</b>        | <b>NA</b>                                                                                | <b>NA</b>         | <b>NA</b>                                             |

|                                                                                 |                 |                |                 |                |                 |                |
|---------------------------------------------------------------------------------|-----------------|----------------|-----------------|----------------|-----------------|----------------|
| <b>Printer</b>                                                                  | <b>NA</b>       | <b>200</b>     | <b>NA</b>       | <b>NA</b>      | <b>NA</b>       | <b>NA</b>      |
| <b>Air-conditioners</b>                                                         | <b>NA</b>       | <b>200</b>     | <b>NA</b>       | <b>NA</b>      | <b>NA</b>       | <b>NA</b>      |
| <b>1-year warranty extension – GX-IV (4-Module System) *</b>                    | <b>NA</b>       | <b>NA</b>      | <b>NA</b>       | <b>NA</b>      | <b>NA</b>       | <b>2898</b>    |
| <b>Maintenance with warranty extension for TB-LAMP *</b>                        | <b>NA</b>       | <b>NA</b>      | <b>1892</b>     | <b>NA</b>      | <b>1892</b>     | <b>NA</b>      |
| <b>Consumables</b>                                                              | <b>34737.12</b> | <b>1350.29</b> | <b>27870.48</b> | <b>1552.98</b> | <b>32051.05</b> | <b>1785.93</b> |
| Cost per cartridge or test*                                                     | 8.6             | 9.98           | 6 **            | 9.98           | 6 **            | 9.98           |
| Number of tests performed (estimate 15% increase in collected samples per year) | 3672            | NA             | 4222.8          | NA             | 4856.22         | NA             |
| Number of tests performed with Xpert (3.315% of TB LAMP positivity rate)        | NA              | 123            | NA              | 141.46         | NA              | 162.68         |
| Losses due to error/incorrect use (high estimate 10%)                           | 367.2           | 12.3           | 422.28          | 14.14          | 485.62          | 16.26          |
| Total tests performed                                                           | 4039.2          | 135.3          | 4645.08         | 155.61         | 5341.84         | 178.95         |

|                                            |                 |                 |                 |                |                 |                |
|--------------------------------------------|-----------------|-----------------|-----------------|----------------|-----------------|----------------|
| <b>HR costs (per diem)</b>                 | <b>27880</b>    | <b>27880</b>    | <b>27880</b>    | <b>27880</b>   |                 |                |
| Technician (160 USD/prison×34 prisons)     | 5440            | 5440            | 5440            | 5440           |                 |                |
| Medical Doctor (160 USD/prison×34 prisons) | 5440            | 5440            | 5440            | 5440           |                 |                |
| Nurses (160 USD/prison)                    | 5440            | 5440            | 5440            | 5440           |                 |                |
| Prison staff (20 USD/prison×34 prisons)    | 680             | 680             | 680             | 680            |                 |                |
| TB Regional Coordinator(160 USD/prison)    | 5440            | 5440            | 5440            | 5440           |                 |                |
| Driver (160 USD/prison×34 prisons)         | 5440            | 5440            | 5440            | 5440           |                 |                |
| <b>Total Cost</b>                          | <b>66757.12</b> | <b>20750.29</b> | <b>55750.48</b> | <b>1552.98</b> | <b>59931.05</b> | <b>4683.93</b> |
| <b>Total Cost per Year</b>                 | <b>87507.41</b> | <b>57303.46</b> | <b>64614.99</b> |                |                 |                |

\*References of prices: Global Drug Facility (GDF). Diagnostics Catalog 2018. available on [http://www.stoptb.org/assets/documents/gdf/Diagnostics\\_Catalog\\_2018\\_WEB.pdf](http://www.stoptb.org/assets/documents/gdf/Diagnostics_Catalog_2018_WEB.pdf);

\*\*References of prices available in the GDF diagnostics catalog. HumaLoop T  
For the prices that are indicated in Euro on the website; Exchange rate: 1€ = 1.13 \$,  
NA: not applicable

**Table 8: Cost estimate for villages using Algorithm 1 (Testing with Gene Xpert MTB/RIF) for three years**

| <b>Algorithm 1: Testing with Gene Xpert MTB/RIF</b>                                   |                                                                                                              |                |                |                 |
|---------------------------------------------------------------------------------------|--------------------------------------------------------------------------------------------------------------|----------------|----------------|-----------------|
|                                                                                       |                                                                                                              | <b>Year 1</b>  | <b>Year 2</b>  | <b>Year 3</b>   |
| <b>Items</b>                                                                          |                                                                                                              |                |                |                 |
| <b>GeneXpert GX-IV (4-Module System) with Desktop and 2-years warranty extension*</b> |                                                                                                              | <b>17000</b>   | <b>NA</b>      | <b>NA</b>       |
| <b>Shipment</b>                                                                       |                                                                                                              | <b>1000</b>    | <b>NA</b>      | <b>NA</b>       |
| <b>UPS</b>                                                                            |                                                                                                              | <b>1000</b>    | <b>NA</b>      | <b>NA</b>       |
| <b>Printer</b>                                                                        |                                                                                                              | <b>200</b>     | <b>NA</b>      | <b>NA</b>       |
| <b>Air-conditioners</b>                                                               |                                                                                                              | <b>200</b>     | <b>NA</b>      | <b>NA</b>       |
| <b>1-year warranty extension – GX-IV (4-Module System)*</b>                           |                                                                                                              | <b>NA</b>      | <b>NA</b>      | <b>2898</b>     |
| <b>Consumables</b>                                                                    |                                                                                                              | <b>4424.13</b> | <b>5087.75</b> | <b>5850.917</b> |
|                                                                                       | Cost per cartridge*                                                                                          | 9.98           | 9.98           | 9.98            |
|                                                                                       | Number of tests performed during mass screening campaign (15% increase in collected samples number per year) | 403            | 463.45         | 532.96          |
|                                                                                       | Losses due to error/incorrect use (high estimate 10%)                                                        | 40.3           | 46.34          | 53.29           |
|                                                                                       | Total tests performed                                                                                        | 443.3          | 509.79         | 586.26          |
| <b>HR costs (per diem)</b>                                                            |                                                                                                              | <b>2460</b>    | <b>2460</b>    | <b>2460</b>     |
|                                                                                       | Technician (160 USD/village×3 villages)                                                                      | 480            | 480            | 480             |
|                                                                                       | Medical Doctor (160 USD/village×3 villages)                                                                  | 480            | 480            | 480             |
|                                                                                       | Nurses (160 USD/village×3 villages)                                                                          | 480            | 480            | 480             |
|                                                                                       | Community health workers (20 USD/village×3 village)                                                          | 60             | 60             | 60              |
|                                                                                       | TB Regional Coordinator(160 USD/village×3 village)                                                           | 480            | 480            | 480             |

|                                                                                                                                                                                                                                                                                         |                 |                |                 |
|-----------------------------------------------------------------------------------------------------------------------------------------------------------------------------------------------------------------------------------------------------------------------------------------|-----------------|----------------|-----------------|
| Driver (160 USD/village×3 villages)                                                                                                                                                                                                                                                     | 480             | 480            | 480             |
| <b>Total Cost per year</b>                                                                                                                                                                                                                                                              | <b>26284.13</b> | <b>7547.75</b> | <b>11208.91</b> |
| *References of prices: Global Drug Facility (GDF). Diagnostics Catalog 2018. available on <a href="http://www.stoptb.org/assets/documents/gdf/Diagnostics_Catalog_2018_WEB.pdf">http://www.stoptb.org/assets/documents/gdf/Diagnostics_Catalog_2018_WEB.pdf</a> ;<br>NA: not applicable |                 |                |                 |

**Table 9: Cost estimate for villages using Algorithm 2 (Initial testing with TB-LAMP followed by testing with Xpert MTB/RIF) for three years**

| <b>Algorithm 2: Initial testing with TB-LAMP followed by testing with Xpert MTB/RIF</b> |                                                     |                                                                                         |                  |                                                                                          |                  |                                                       |
|-----------------------------------------------------------------------------------------|-----------------------------------------------------|-----------------------------------------------------------------------------------------|------------------|------------------------------------------------------------------------------------------|------------------|-------------------------------------------------------|
|                                                                                         | <b>Year 1</b>                                       |                                                                                         | <b>Year 2</b>    |                                                                                          | <b>Year 3</b>    |                                                       |
| <b>Items</b>                                                                            | <b>HumaLoopT with 1 year warranty upon purchase</b> | <b>GeneXpert GX-IV(4-Module System) with Desktop and 2-years warranty upon purchase</b> | <b>HumaLoopT</b> | <b>GeneXpert GX-IV (4-Module System with Desktop) and 2-years warranty upon purchase</b> | <b>HumaLoopT</b> | <b>GeneXpert GX-IV (4-Module System) with Desktop</b> |
| Equipment*                                                                              | <b>2870</b>                                         | <b>17000</b>                                                                            | NA               | NA                                                                                       | NA               | NA                                                    |
| Shipment                                                                                | <b>800</b>                                          | <b>1000</b>                                                                             | NA               | NA                                                                                       | NA               | NA                                                    |
| UPS                                                                                     | <b>470</b>                                          | <b>1000</b>                                                                             | NA               | NA                                                                                       | NA               | NA                                                    |
| Printer                                                                                 | NA                                                  | <b>200</b>                                                                              | NA               | NA                                                                                       | NA               | NA                                                    |
| Air-conditioners                                                                        | NA                                                  | <b>200</b>                                                                              | NA               | NA                                                                                       | NA               | NA                                                    |
| 1-year warranty extension – GX-IV (4-Module System)*                                    | NA                                                  | NA                                                                                      | NA               | NA                                                                                       | NA               | <b>2898</b>                                           |
| Maintenance with warranty extension for TB-LAMP*                                        | NA                                                  | NA                                                                                      | <b>1892</b>      | NA                                                                                       | <b>1892</b>      | NA                                                    |

|                                                                            |                |                |                |               |                |                  |
|----------------------------------------------------------------------------|----------------|----------------|----------------|---------------|----------------|------------------|
| Consumables                                                                | <b>3812.38</b> | <b>131.736</b> | <b>3058.77</b> | <b>151.61</b> | <b>3517.58</b> | <b>174.35733</b> |
| Cost per cartridge or test*                                                | 8.6            | 9.98           | 6**            | 9.98          | 6**            | 9.98             |
| Number of performed (estimated 15% increase in collected samples per year) | 403            | NA             | 463.45         | NA            | 532.96         | NA               |
| Number of tests performed with Xpert (2.98% of TB LAMP positivity rate)    | NA             | 12             | NA             | 13.81         | NA             | 15.88            |
| Losses due to error/incorrect use (high estimate 10%)                      | 40.3           | 1.2            | 46.34          | 1.38          | 53.29          | 1.58             |
| Total tests performed                                                      | 443.3          | 13.2           | 509.79         | 15.19         | 586.26         | 17.47            |
| HR costs (per diem)                                                        | <b>2460</b>    |                | <b>2460</b>    |               | <b>2460</b>    |                  |
| Technician (160 USD/village× 3 villages)                                   | 480            |                | 480            |               | 480            |                  |
| Medical Doctor (160)                                                       | 480            |                | 480            |               | 480            |                  |

|                                                                  |                 |                 |                |               |                |                |
|------------------------------------------------------------------|-----------------|-----------------|----------------|---------------|----------------|----------------|
| USD/village×3<br>villages                                        |                 |                 |                |               |                |                |
| Nurses (160<br>USD/village×3<br>villages)                        | 480             |                 | 480            |               | 480            |                |
| Community<br>health workers<br>(20 USD/<br>village×3<br>village) | 60              |                 | 60             |               | 60             |                |
| TB Regional<br>Coordinator(160<br>USD/ village×3<br>village)     | 480             |                 | 480            |               | 480            |                |
| Driver (160<br>USD/village×3<br>villages)                        | 480             |                 | 480            |               | 480            |                |
| <b>Total Cost</b>                                                | <b>10412.38</b> | <b>19531.73</b> | <b>5518.77</b> | <b>151.61</b> | <b>5977.58</b> | <b>3072.35</b> |
| <b>Total Cost per<br/>Year</b>                                   | <b>29944.11</b> |                 | <b>5670.38</b> |               | <b>9049.94</b> |                |

\*References of prices: *Global Drug Facility (GDF). Diagnostics Catalog 2018. available on [http://www.stoptb.org/assets/documents/gdf/Diagnostics\\_Catalog\\_2018\\_WEB.pdf](http://www.stoptb.org/assets/documents/gdf/Diagnostics_Catalog_2018_WEB.pdf);*

\*\*References of prices available in the GDF diagnostics catalog. HumaLoop T  
For the prices are indicated in Euro on the website. Exchange rate: 1€ = 1.13 \$,  
NA: not applicable
